# Supplementary material for: Axillary Management in Breast Cancer Patients Undergoing Upfront Surgery: Results from a Nationwide Survey on Behalf of the Clinical Oncology Breast Cancer Group (COBCG) and the Breast Cancer Study Group of the Italian Association of Radiotherapy and Clinical Oncology (AIRO)
Source: MDPI journal article supplement (doi:10.3390/curroncol30080542), 2023-08-08
Supplement: s1 [file s1]

## **Survey:**

**AXILLARY MANAGEMENT IN EARLY STAGE BREAST CANCER PATIENTS  
UNDERGOING UPFRONT SURGERY: PATTERN OF PRACTICE IN ITALY**

## ***Section 1: General items***

### **Q1: Years of experience as a Radiation Oncologist**

- a) < 5 years
- b) 5-10 years (5 to 10)
- c) > 10 years

### **Q2: Italian region in which you practice your profession**

- a) Abruzzo
- b) Basilicata
- c) Calabria
- d) Campania
- e) Emilia-Romagna
- f) Friuli-Venezia Giulia
- g) Lazio
- h) Liguria
- i) Lombardia
- j) Marche
- k) Molise
- l) Piemonte
- m) Puglia
- n) Sardegna
- o) Sicilia
- p) Toscana
- q) Trentino-Alto Adige
- r) Umbria
- s) Valle d'Aosta
- t) Veneto

### **Q3: Province in which you practice your profession**

- Agrigento
- Alessandria
- Ancona
- Aosta
- Arezzo
- Ascoli Piceno
- Asti
- Avellino

- Bari
- Barletta-Andria-Trani
- Belluno
- Benevento
- Bergamo
- Biella
- Bologna
- Bolzano
- Brescia
- Brindisi
- Cagliari
- Caltanissetta
- Campobasso
- Carbonia-Iglesias
- Caserta
- Catania
- Catanzaro
- Chieti
- Como
- Cosenza
- Cremona
- Crotone
- Cuneo
- Enna
- Fermo
- Ferrara
- Firenze
- Foggia
- Forlì-Cesena
- Frosinone
- Genova
- Gorizia
- Grosseto
- Imperia
- Isernia
- La Spezia
- L'Aquila
- Latina
- Lecce

- Lecco
- Livorno
- Lodi
- Lucca
- Macerata
- Mantova
- Massa-Carrara
- Matera
- Messina
- Milano
- Modena
- Monza e Brianza
- Napoli
- Novara
- Nuoro
- Olbia-Tempio
- Oristano
- Padova
- Palermo
- Parma
- Pavia
- Perugia
- Pesaro e Urbino
- Pescara
- Piacenza
- Pisa
- Pistoia
- Pordenone
- Potenza
- Prato
- Ragusa
- Ravenna
- Reggio Calabria
- Reggio Emilia
- Rieti
- Rimini
- Roma
- Rovigo
- Salerno

- Medio Campidano
- Sassari
- Savona
- Siena
- Siracusa
- Sondrio
- Taranto
- Teramo
- Terni
- Torino
- Ogliastro
- Trapani
- Trento
- Treviso
- Trieste
- Udine
- Varese
- Venezia
- Verbano-Cusio-Ossola
- Vercelli
- Verona
- Vibo Valentia
- Vicenza
- Viterbo

**Q4: Kind of Institution in which you currently work (multi-choice frame)**

- a) Highly specialized Hospital
- b) Scientific Institute for Research and Healthcare
- c) Academic Hospital
- d) Non-academic Hospital
- e) Residential care center

**Q5: Kind of radiotherapy reimbursement systems in the Institution in which you work (multi-choice frame)**

- a) Public practice
- b) Private practice
- c) Agreed private practice

**Q6: Radiation Therapy Techniques available in the Institute in which you currently work (multi-choice frame)**

- a) X-ray IORT
- b) Electron beam IORT
- c) Multi-catheter interstitial brachytherapy LDR
- d) Multi-catheter interstitial brachytherapy HDR
- e) Multi-catheter interstitial brachytherapy PDR
- f) Balloon based brachytherapy
- g) 3D-CRT
- h) IMRT
- i) VMAT
- j) Tomotherapy
- k) Cyberknife
- l) Protontherapy
- m) Other \_\_\_\_\_

**Q7: How many breast cancer patients are treated per year in the Radiation Oncology Department in which you currently work?**

- a) < 50
- b)  $\geq 50$  e < 100
- c)  $\geq 100$  e < 200
- d)  $\geq 200$  e < 500
- e)  $\geq 500$

**Q8: How many breast cancer patients do you evaluate per year?**

- a) <10
- b)  $\geq 10$  e < 50
- c)  $\geq 50$  e < 100
- d)  $\geq 100$

**Q9: In your Institution, how many breast cancer patients (%) receive a treatment after a multidisciplinary discussion?**

- a)  $\geq 75\%$
- b)  $\geq 50\%$  e < 75%
- c)  $\geq 25\%$  e < 50%
- d) < 25%

***Section 2: Surgical management in patients with early breast cancer and 1-2 macrometastases after BLS***

**Q10: In your Institution, is axillary dissection performed in patients with early-stage breast cancer after conservative surgery (BCS)/mastectomy and 1-2 macrometastases after sentinel lymph node biopsy (SLNB)?**

- a) Yes, always
- b) No, never
- c) In selected cases

**If you answered “Yes, always”, you finish the survey here**

**If you answered “No, never” or “in selected cases”, you can continue the survey**

**Q11: In your Institution, what kind of surgery is performed in patients with early stage breast cancer and 1-2 macrometastases after BLS did not undergo axillary dissection**

- a) Breast Conservative Surgery (BCS)
- b) Mastectomy
- c) Both

**Q12: If you answered “in selected cases” to the Q10 question, you can indicate which selection criteria are used in your Institution to omit axillary dissection in patients with with 1-2 macrometastases after SLNB (multi-choice frame)**

- a) Z0011 study criteria (T1-T2, with 1-2 macrometastases after SLNB, No neoadjuvant chemotherapy, Indication to Whole Breast Irradiation after breast conservative surgery)
- b) Age, clinical comorbidities and tumor biology
- c) Treatment is defined after discussion within a multidisciplinary board taking into account age, clinical comorbidities and tumor biology
- d) There was no a multidisciplinary discussion
- e) Breast surgeons decide according to international guidelines (ASCO, NCCN)
- f) Other criteria (specify)

**Q13: Over the last three years (2019-2021), how many patients with early stage breast cancer and 1-2 macrometastases after BLS did not undergo axillary dissection in your Institution?**

- a)  $\geq 75\%$
- b)  $\geq 50\%$  e  $< 75\%$
- c)  $\geq 25\%$  e  $< 50\%$

d) < 25%

**Q14: Over the last three years (2019-2021), have you detected an increased number of patients with early stage breast cancer and 1-2 macrometastases after BLS who did not undergo axillary dissection in your Institution?**

a) Yes

b) No

***Section 3: Lymph node irradiation in patients with early breast cancer and 1-2 macrometastases after BLS who did not undergo axillary dissection***

**Q15: In your Institution, in patients with early stage breast cancer and 1-2 macrometastases after BLS, who did not undergo axillary dissection, do you irradiate the breast only?**

a) Yes, always

b) No, never

c) In selected cases

**If you answered “Yes, always”, you finish the survey here**

**If you answered “No, never” or “in selected cases”, you can continue the survey**

**Q16: If you answered "In selected cases" to question Q15, please indicate which are the selection criteria that you evaluate to decide if regional nodal irradiation (RNI) is needed in your Institution?**

**Express your agreement about the selection criteria (to rate the importance) using a 5-point Likert scale.**

**Where required, specify your inclusion criteria (multi-choice frame)**

a) Tumor size: ☐1 ☐2 ☐3 ☐4 ☐5



- Inclusion criteria (specify): \_\_\_\_\_
- b) Number of macrometastases after BLS: ☐1 ☐2 ☐3 ☐4 ☐5
- Inclusion criteria (specify): \_\_\_\_\_
- c) Age: ☐1 ☐2 ☐3 ☐4 ☐5
- Inclusion criteria (specify): \_\_\_\_\_
- d) Menopausal state: ☐1 ☐2 ☐3 ☐4 ☐5
- e) Presence of Lymphovascular invasion (LVI): ☐1 ☐2 ☐3 ☐4 ☐5
- f) Presence of extracapsular extension (ECE): ☐1 ☐2 ☐3 ☐4 ☐5
- g) Unfavorable biologic profile: ☐1 ☐2 ☐3 ☐4 ☐5
- Inclusion criteria (specify): \_\_\_\_\_
- h) Patient preference: ☐1 ☐2 ☐3 ☐4 ☐5
- i) Other relevant factors (specify) \_\_\_\_\_

**Q17: Usually, what was the “clinical target volume” in case of RNI?**

- a) Nodal level: 1
- b) Nodal level: 1-2
- c) Nodal level: 1-2-3
- d) Nodal level: 1-2-3-4
- e) Nodal level: 3-4

**Q18: What Radiation Therapy Technique do you usually use for RNI? (multi-choice frame)**

- a) 3D-CRT
- b) IMRT/VMAT/Tomotherapy
- c) Protontherapy
- d) Other (specify) \_\_\_\_\_

**Q19: Which treatment schedule do you usually use for RNI?**

- a) Normo-fractionated scheme
- b) Moderate hypofractionation
- c) Other (specify) \_\_\_\_\_

**Q20: Indicate dose constraints (related to Whole Breast/RNI treatment plan) used for treatment plan optimization**

- a) Lung Dose Constraints \_\_\_\_\_
- b) Heart Dose Constraints \_\_\_\_\_
- c) LAD Dose Constraints \_\_\_\_\_
- d) Brachial plexus Dose Constraints \_\_\_\_\_
- e) Humeral head Dose Constraints \_\_\_\_\_
- f) Thyroid Dose Constraints \_\_\_\_\_

#### ***Section 4: Conclusion***

**Q21: Would you be joined in observational multicenter studies on lymph node irradiation in early breast cancers with 1-2 positive BLS for macrometastases did not undergo to axillary dissection?**

- a) Yes
- b) No

If Yes, please specify your e-mail address: \_\_\_\_\_
