# Supplementary material for: Axillary Management in Breast Cancer Patients Undergoing Upfront Surgery: Results from a Nationwide Survey on Behalf of the Clinical Oncology Breast Cancer Group (COBCG) and the Breast Cancer Study Group of the Italian Association of Radiotherapy and Clinical Oncology (AIRO)
Source: MDPI journal article supplement (doi:10.3390/curroncol30080542), 2023-08-08
Supplement: s1 [file s1]

CONSTRAINTS Ipsilateral Lung

(centres 26/28)

| V30             | V25     | V20      | V18      | V17      | V16      | V10      | V8          | V5                 | V4          | MLD       |
|-----------------|---------|----------|----------|----------|----------|----------|-------------|--------------------|-------------|-----------|
| <9% (1)         | <5% (2) |          |          |          |          |          |             |                    |             | 7 Gy (1)  |
| <10% (1)        |         | <10% (2) |          |          | <10% (1) |          |             |                    |             | 9 Gy (3)  |
| <15% (1)<br>V31 |         | <15% (4) |          |          | <15% (2) |          |             |                    |             | 10 Gy (1) |
| < 30% (1)       |         | <20% (5) | <20% (1) | <20% (1) | <20% (2) |          | <20%        |                    |             | 12 Gy (1) |
|                 |         | <25% (1) |          | <35% (2) |          |          |             |                    |             | 13 Gy (1) |
|                 |         | <30% (2) |          |          |          |          |             |                    |             | 16 Gy (1) |
|                 |         |          |          |          |          |          | <30-35% (4) | <40% (2)           | <40-50% (5) |           |
|                 |         |          |          |          |          | <50% (1) | <40% (1)    | <60% (1)           |             |           |
|                 |         |          |          |          |          |          |             | <65% (2)<br>[V4.8] |             |           |
|                 |         |          |          |          |          |          |             | <85% (1)           |             |           |

CONSTRAINTS Contralateral Breast

(centres 20/28)

| Dmean                  | Dmax        | D1%        | D2%       | D50%        |  |
|------------------------|-------------|------------|-----------|-------------|--|
| <1.5 Gy (1)            | <2.4 Gy (1) | <2.4 Gy(1) | 10 Gy (1) | <4.9 Gy (1) |  |
| <3 Gy (8)              |             |            |           |             |  |
| <4 Gy (2)              |             |            |           |             |  |
| < 5 Gy (2)             |             |            |           |             |  |
| Minimizzare la V10 (4) |             |            |           |             |  |

CONSTRAINTS Heart

(centres 26/28)

| Dmean                         | V5 | V8       | V10     | V15      | V16     | V17      | V18     | V20      | V25      | V40     |
|-------------------------------|----|----------|---------|----------|---------|----------|---------|----------|----------|---------|
| <3Gy (6)<br>[2.5Gy-<br>3.2Gy] |    | <10% (2) | <5% (1) | <4% (1)  | <5% (3) | <10% (1) | <5% (2) | <5% (1)  | <5% (2)  | <3% (2) |
| <4 Gy (7)                     |    | <15% (1) |         | <30% (1) |         |          |         | <10% (1) | <10% (3) | <5% (1) |

|            |      |          |  |  |  |  |  |            |  |  |
|------------|------|----------|--|--|--|--|--|------------|--|--|
| <5 Gy (10) |      | <25% (1) |  |  |  |  |  | <12.5% (2) |  |  |
| <8Gy (1)   |      | <30% (4) |  |  |  |  |  |            |  |  |
| <25Gy?     | <40% |          |  |  |  |  |  |            |  |  |
|            |      |          |  |  |  |  |  |            |  |  |
|            |      |          |  |  |  |  |  |            |  |  |

#### CONSTRAINTS Left Anterior Descending Coronary

(centres 18/28)

| Dmax      | Dmean        | V40-45  | V30     |  |  |  |
|-----------|--------------|---------|---------|--|--|--|
| 20 Gy (3) | 20-25 Gy (7) | <1% (5) | <2% (4) |  |  |  |
| 30 Gy (1) | 13 Gy (1)    |         |         |  |  |  |
| 13 Gy (1) | 10Gy (6)     |         |         |  |  |  |

#### CONSTRAINTS Brachial Plexus

(centres 10/28)

| Dmax        | Dmean    | V60      | D1%          |  |
|-------------|----------|----------|--------------|--|
| 60 Gy (1)   | 54Gy (1) | < 5% (1) | <39.6 Gy (2) |  |
| 54 Gy ((2)  |          |          |              |  |
| 52.5 Gy (1) |          |          |              |  |
| 50 Gy (1)   |          |          |              |  |
| 45 Gy (1)   |          |          |              |  |

#### CONSTRAINTS Humeral Head

(centres 15/28)

| Dmax      | Dmean     | V50      | V45      | D1%        | D2%        |  |  |  |  |
|-----------|-----------|----------|----------|------------|------------|--|--|--|--|
| 50 Gy (1) | 40 Gy (4) | <10% (2) | < 5% (1) | <30 Gy (1) | <30 Gy (1) |  |  |  |  |
| 45 Gy (1) | 35 Gy (1) |          | <10% (1) |            |            |  |  |  |  |
|           | 25 Gy (1) |          |          |            |            |  |  |  |  |

#### CONSTRAINTS Cervical Oesophagus

(centres 12/28)

| Dmax      | Dmean      | V50      | V40      | V35      | V28      | D1%          |  |  |
|-----------|------------|----------|----------|----------|----------|--------------|--|--|
| 45 Gy (1) | <34 Gy (5) | <40% (2) | <40% (1) | <50% (4) | <45% (2) | <9-15 Gy (1) |  |  |
| 30 Gy (1) | <28 Gy (1) |          | <35% (1) |          |          |              |  |  |
| 15 Gy (1) | <25 Gy (1) |          |          |          |          |              |  |  |

|  |           |  |  |  |  |  |  |  |
|--|-----------|--|--|--|--|--|--|--|
|  | <9 Gy (1) |  |  |  |  |  |  |  |
|--|-----------|--|--|--|--|--|--|--|

CONSTRAINTS Glottic Larynx (centres 4/28)

| Dmean       | V50     |  |  |  |  |
|-------------|---------|--|--|--|--|
| 44-45Gy (2) | 27% (2) |  |  |  |  |
| 30 Gy (1)   |         |  |  |  |  |
| 25 Gy (1)   |         |  |  |  |  |

CONSTRAINTS Liver (centres 4/28)

| Dmean      | V40      | V15      | V13      |  |  |
|------------|----------|----------|----------|--|--|
| <20 Gy (1) | <30% (1) | <10% (1) | <10% (1) |  |  |
| <4 Gy (2)  |          |          |          |  |  |

CONSTRAINTS Thyroid (centres 11/28)

| Dmean      | V45      | V30        | V16.1    |  |  |
|------------|----------|------------|----------|--|--|
| <30Gy (1)  | <50% (3) | <62.5% (1) | <50% (2) |  |  |
| <20 Gy (2) |          | <50% (1)   |          |  |  |
| <21 Gy (3) |          |            |          |  |  |

CONSTRAINTS Contralateral Lung (centres 16/28)

| Dmean      | V4       | V5              | V13.8   | V20     |  |
|------------|----------|-----------------|---------|---------|--|
| <8 Gy (3)  | <10% (3) | <5% (1)         | <3% (1) | <1% (1) |  |
| <6 Gy (2)  | <15% (1) | <10% (1)        |         |         |  |
|            |          | <25% (V4.8) (1) |         |         |  |
| <4 Gy (2)  |          | <35% (1)        |         |         |  |
| <2.5Gy (1) |          | <46% (1)        |         |         |  |
